# Supplementary material for: The Spliceosome: A New Therapeutic Target in Chronic Myeloid Leukaemia
Source: Cancers (Basel). 2022 Sep 27;14(19):4695. doi: 10.3390/cancers14194695 (PMC9563771; doi:10.3390/cancers14194695)
Supplement: Supplementary file 1 [file cancers-14-04695-s001.zip › Supplemental Tables.xlsx]

## Sheet: Legend
Supplemental Table S1	Characteristics of patients with CP-CML
Supplemental Table S2	Primers sequences RT-qPCR
Supplemental Table S3	Primers sequences Fluidigm
Supplemental Table S4	rhAmp genotyping
Supplemental Table S5	NGS Panel

## Sheet: Table S1
Patient	Genre	Age at diagnosis	Sokal	Hasford	EUTOS	ELTS	Leucocytose (x109/L)	BCR-ABL Transcript	M3 (%)	M6 (%)	M12 (%)	ELN Response	Sample	Cell fraction	Fluidigm	NGS	Spliceosome drugs	CFC	RNA-seq
1	F	48	Intermediate	1031	90	1.5072	72.44	b2a2	0.38	0.083	0.048	Optimal	Peripheral blood	CD34	x
2	M	69	Intermediate	1036	42	1.5411	63.8	major	1.9	ND	0.013	Optimal	Peripheral blood	CD34	x
3	M	36	Intermediate	764.9	89	1.5189	304.86	b3a2	10	0.49	0.25	Warning	Peripheral blood	CD34	x
4	M	63	Intermediate	1001.22	35	2.5361	151.39	ND	0.1	0.014	0.009	Optimal	Peripheral blood	CD34	x
5	M	59	Intermediate	ND	ND	1.9894	108.45	b2a2	0.29	0.14	ND	Optimal	Peripheral blood	CD34	x
6	F	65	Intermediate	957	15	1.671	49.11	b3a2	0.00074	0.00011	ND	Optimal	Peripheral blood	CD34	x
7	M	58	Low	749	0	1.3492	46.08	b2a2	9.3	0.45	0.14	Warning	Peripheral blood	CD34	x
8	F	40	Intermediate	ND	ND	1.06	187.7	b3a2	9.8	10	0.19	Warning	Peripheral blood	CD34	x
9	M	48	Low	245	28	0.9081	27.39	b2a2	0.075	0.0091	0.0024	Optimal	Peripheral blood	CD34	x
10	F	67	Low	749.2	14	1.551	37.27	b2a2	2.24	1.7	ND	Warning	Peripheral blood	CD34	x
11	M	40	Low	403.3	35	0.912	154.71	b3a2/b2a2	1.7	0.1	0.16	Warning	Peripheral blood	CD34	x
12	M	58	Low	1056	46.9	1.3418	56.73	b3a2	10	2.3	0.014	Optimal	Peripheral blood	CD34	x
13	M	30	High	1332	0.57	1.662	277.15	b2a2	4.5716	0.1704	41.3789	Failure	Peripheral blood	CD34	x
14	F	58	Low	687.24	21	1.0053	25.5	p210	0.07	0.072	0.014	Optimal	Peripheral blood	CD34	x
15	F	67	ND	ND	ND	ND	32.94	b3a2/b2a2	17.3	0.26	0.0338	Optimal	Peripheral blood	CD34	x
16	M	44	Low	ND	ND	ND	311.13	b2a2	0.648	0.4425	0.1032	Warning	Peripheral blood	Blood lysis		x
17	F	32	High	1014	60	1.756	63.69	b2a2	0.024	0	0	Optimal	Peripheral blood	Blood lysis		x
18	F	73	High	2130.2	84	3.273	63.43	b3a2	7	4	0.1	Optimal	Peripheral blood	Blood lysis		x
19	M	65	High	1444.1	54	2.534	287	b2a2	43.7	ND	1.42	Failure	Peripheral blood	Blood lysis		x
20	F	67	High	1606.3	87	3.714	32.94	b3a2/b2a2	17.3	0.26	0.0338	Optimal	Peripheral blood	Blood lysis		x
21	M	79	High	1499.8	77	3.005	44.49	b3a2/b2a2	0.25	0.02	15.6	Failure	Peripheral blood	Blood lysis		x
22	F	57	Low	984	29	1.278	ND	b3a2	0.1	0.006	0.0016	Optimal	Peripheral blood	Blood lysis		x
23	M	78	High	1172.2	7	1.126	319.2	b2a2	ND	1.3	0.4	Warning	Peripheral blood	Blood lysis		x
24	M	57	High	2417.8	165	3.526	99.6	b3a2	6	3	0.3	Warning	Peripheral blood	Blood lysis		x
25	F	75	High	1094.1	42	1.604	70.35	b2a2	0.42	0.42	0.25	Warning	Peripheral blood	Blood lysis		x
26	F	17	ND	ND	ND	ND	ND	ND	<10	ND	ND	Optimal	Bone marrow	CD34			x
27	F	23	Low	459	ND	ND	ND	ND	ND	ND	0.5	Warning	Bone marrow	CD34			x
28	M	66	ND	1412	ND	ND	ND	ND	ND	ND	3.6	Failure	Bone marrow	CD34			x
29	F	52	High	1412.4	47	1.55622	70.6	b3a2/b2a2	0.0034	ND	0	Optimal	Peripheral blood	Blood lysis	x
30	M	40	Low	403.3	35	0.909545	154.71	b3a2/b2a2	1.7	ND	0.29	Warning	Peripheral blood	Blood lysis	x
31	M	83	Intermediate	666.6	0	2.71024	34.13	b3a2	3.1	ND	0.54	Warning	Peripheral blood	Blood lysis	x
32	F	72	Intermediate	953.1	49	1.74098	65	b3a2/b2a2	ND	5.4	0.65	Warning	Peripheral blood	Blood lysis	x
33	M	73	Intermediate	831.8	0	1.68939	11	b3a2	1.05	ND	0.0086	Optimal	Peripheral blood	Blood lysis	x
34	M	36	Intermediate	962.2	63	1.50152	187.1	b3a2	3.3	ND	3.3	Failure	Peripheral blood	Blood lysis	x
35	F	47	High	1013.62	53	2.57998	586	b3a2	1.73	ND	0.042	Optimal	Peripheral blood	Blood lysis	x
36	M	18	Low	797.7	53	1.47873	421	b2a2	27.9	ND	0.87	Warning	Peripheral blood	Blood lysis	x
37	M	56	Intermediate	1254.3	47	1.93509	205	b3a2	4.4	ND	0.23	Warning	Peripheral blood	Blood lysis	x
38	M	68	Low	687.25	3.5	1.6202	150.1	b2a2	5.1	ND	0.82	Warning	Peripheral blood	Blood lysis	x
39	F	59	Low	707.9	24.5	1.12151	47.1	b2a2	1.18	ND	0.0021	Optimal	Peripheral blood	Blood lysis	x
40	M	70	Intermediate	890.2	7	1.86483	123.3	b2a2	1.7	ND	0.146	Warning	Peripheral blood	Blood lysis	x
41	M	74	Intermediate	1052.8	35	1.68283	45.82	b2a2	2.9	ND	0.033	Optimal	Peripheral blood	Blood lysis	x
42	F	21	Low	838.3	49	1.61431	591	b2a2	8.5	ND	0.14	Warning	Peripheral blood	Blood lysis	x
43	M	23	Low	477.7	36	1.69978	101.4	b3a2	1.03	ND	0.03	Optimal	Peripheral blood	Blood lysis	x
44	F	87	Intermediate	972.8	14	1.68578	43.23	b3a2	7.7	ND	0.21	Warning	Peripheral blood	Blood lysis	x
45	M	66	Intermediate	1052.8	63	1.54693	20.91	b3a2	1.7	ND	0.015	Optimal	Peripheral blood	Blood lysis	x
46	M	64	Intermediate	936.58	36.4	1.24826	30.47	b3a2	13.7	ND	0.0174	Optimal	Peripheral blood	Blood lysis	x
47	M	37	Low	286.5	70	0.848039	20.28	b2a2	0.39	ND	0.082	Optimal	Peripheral blood	Blood lysis	x
48	F	38.7734	Faible	247.8	14	0.5727	38.44	b3a2	0.0013	0	0	Optimal	Peripheral blood	CD34				x
49	M	23.4333	Intermediate	1105.3	61	2.0169	ND	ND	ND	ND	ND	ND	Peripheral blood	CD34				x
50	M	66.037	High	1301.7	39	2.652	398.6	b3a2	ND	ND	ND	ND	Peripheral blood	CD34				x
51	F	59.1184	High	1571.2	80	2.094	214.41	b3a2	2.7	0.46	0.12	Warning	Peripheral blood	CD34				x
52	M	51.3292	Low	670.7	7	1.1574	33.15	b2a2	2.2	ND	ND	ND	Peripheral blood	CD34				x
53	M	64.7337	Low	684.83	7	2.1284	61.59	major	37	6.1	ND	ND	Peripheral blood	CD34				x
54	M	26.1684	Low	262.3	21	0.7069	ND	ND	ND	ND	ND	ND	Peripheral blood	CD34				x
55	M	71.9836	Intermediate	749.2	14	1.4696	ND	ND	ND	ND	ND	ND	Peripheral blood	CD34				x
56	M	48	High	ND	107	1.69	ND	ND	0.73	ND	ND	ND	Peripheral blood	CD34				x
57	M	47	Intermediate	602	50	1.5328	245	e13a2 / e14a2	103	6.1	0.6	Optimal	Peripheral blood	CD34					x
58	ND	ND	ND	ND	ND	ND	ND	ND	ND	ND	ND	ND	Peripheral blood	CD34					x
59	F	19	Intermediate	1309	101	1.9177	327	e13a2 / e14a2	BP progression	ND	ND	Failure	Preipheral blood	CD34					x
60	F	52	Intermediate	1296	58	1.6971	166	e13a2 / e14a2	9.7	2.74	2.3	Optimal	Peripheral blood	CD34					x

## Sheet: Table S2
Gene	Position	Oligonucleotide sequence (5’ -> 3’)
DDX41	Forward	GTATCCCACCACCCATCAAGAG
	Reverse	TCACGGCCAGATAGAATGGTG
HNRNPA1	Forward	ACGGACTGTGTGGTAATGAGAG
	Reverse	CCTTGTGTGGCCTTGCATTC
HNRNPK	Forward	GCAGTGATTGGAAAAGGAGGC
	Reverse	TGATACTCAATATGCGCTCGGG
MBNL3	Forward	AACAGGCTCTGACTAACCTGC
	Reverse	TGCAGACACAGTGGTAGGTG
PHF5A	Forward	AACTATGGATCTTACCAGGGGC
	Reverse	GCAGCCATCTCTGTCCTTCTC
PRMT5	Forward	CCTGTGGAGGTGAACACAGT
	Reverse	AGAGGATGGGAAACCATGAG
PRPF8	Forward	AAAGGAGACAATCCATCCCCG
	Reverse	ATCACATCCTTGGAGTCAGCC
PTBP1	Forward	TGTCCCAGATATAGCCGTTGG
	Reverse	GCTGTCATTTCCGTTTGCTGC
SRSF1	Forward	CAGAGTGGTTGTCTCTGGACTG
	Reverse	ACCAGTGCCATCTCGGTAAAC
SRSF10	Forward	CTACACTCGCCGTCCAAGAG
	Reverse	ATTTGGTGTCTTTCGATCCCCC
SRSF3	Forward	TGGAACGGGCTTTTGGCTAC
	Reverse	GGCAGCCACATAGTGTTCTTC
U2AF1	Forward	GTACGTCAAGTTTCGCCGTG
	Reverse	AGGCTTCTCTGAAGTCCGTC

## Sheet: Table S3
Gene	Forward Primer	Reverse Primer	Design RefSeq
B2M	TTAGCTGTGCTCGCGCTAC	CTCTGCTGGATGACGTGAGTAA	NM_004048.N
DDX41	GCCCTTGTAAAGCCTGTGAC	CTTGGCCTCCTCCTTCACATA	NM_001321732.N
GUSB	CTTCGAGGAGCAGTGGTAC	TCATTGAAGCTGGAGGGAAC	NM_000181.3
HMBS	AGAGTGATTCGCGTGGGTA	CTTTCAATGTTGCCACCACAC	NM_000190.N
HNRNPA1	CGAAGGTAGGCTGGCAGATA	GGCAGGGTGAAGAGAGACTTTA	NM_031157.N
HNRNPK	CCTTCCCTAACACTGAAACCA	GCAGAATGCGTAATTCAACCA	NM_002140.N
MBNL3	GCCCAAAACTGATGCGTTCA	CAATCATTCTCCCCACGGGTA	NM_001170704.N
PHF5A	TGGGGTCTCTGATGCCTATTA	TAGAGCTCCCCAGATTGACA	NM_032758.N
PPIA	ACCCAACACAAATGGTTCCC	TGCCAAACACCACATGCTT	NM_001300981.N
PRMT5	TGGTTTCCCATCCTCTTCCCTA	ATTGCTGCATCGCCAGAAAC	NM_001039619.N
PRPF8	TGGCTGACTACGGCAAGAAA	CATACCCAGGATGATGTCTCGAA	NM_006445.N
PTBP1	TGTCCCAGATATAGCCGTTGGTAC	ACGGTCCGTTAGTGACACAAGTA	NM_002819.N
RPL13A	GAGGCCCCTACCACTTCC	GCCGTCAAACACCTTGAGAC	NM_012423.N
SDHA	GCCAGGACCTAGAGTTTGTTCA	CTCCACGACATCCTTCCGTAA	NM_004168.N
SRSF1	CCTTCGTTGAGTTCGAGGAC	AGACGGTACCCATCGTAATCA	NM_001078166.N
SRSF10	TTTCTACACTCGCCGTCCAA	TGTAAAGCGTCTTCAGCATCAC	NM_054016.N
SRSF3	TTGAAGATCCCCGAGATGCA	TCTTACACGGCAGCCACATA	NR_036610.N
U2AF1	GAGATGAACGTCTGTGACAACC	CAGCCTTTTCCGCATCTTCC	NM_001025204.N

## Sheet: Table S4
Gene/Assay	Forward Primer	Reverse Primer
RNU1_Batch SNP Assay (WT)	TCCCCTGCCAGGTAAGT	GCGCAAGTGACCGTGTGTGTAA
RNU1_Batch SNP Assay (Mut)	CCCCTGCCAGGTAAGG	GCGCAAGTGACCGTGTGTGTAA
RNU1_Pseudo SNP Assay (WT)	TCCCCTGCCAGGTAAGT	GCAAGTGACCGTGTGTTGAGAG
RNU1_Pseudo SNP Assay (Mut)	CCCCTGCCAGGTAAGG	GCAAGTGACCGTGTGTTGAGAG

## Sheet: Table S5
Gene	Exons
ABL	4-9
ASXL1	9, 11, 12 14
BRAF	15
CALR	9
CBL	8 & 9
CEBPα	Full
CSF3R	Full
HRAS	1-3
DNMT3a	Full
ETV6	Full
EZH2	Full
FLT3	13-15 & 20
IDH1	Full
IDH2	Full
JAK2	Full
KIT	2, 8-11, 13-17 & 18
KRAS	Full
MPL	Full
NPM1	11 & 12
NRAS	Full
PTPN11	3, 7-13
RUNX1	Full
SETBP1	4
SF3B1	10-12 & 13-16
SRSF2	1
TET2	Full
TP53	Full
U2AF1	2 & 6
WT1	6-10
ZRSR2	Full
